# Supplementary material
Source: Research Square preprint supplement (doi:10.21203/rs.3.rs-10312432/v1)
Supplement: Supplementary file 2 [file e44b6440e4697494168c5130.docx]

# Supplementary information - Methods

## Study area and datasets

We define the study area as the Greater Sydney region in New South Wales, Australia, encompassing all spatial locations for which consistent data are available across tree canopy cover, building footprints, land cover, urban land development projections, and climate projections (Extended Data Fig. 1a). The spatial extent is therefore determined by data availability rather than administrative boundaries and represents the maximum contiguous area over which all datasets could be jointly analyzed.

To integrate datasets with different native resolutions and formats, we discretize the Greater Sydney region into a uniform grid of hexagonal microcells that constitute the unit of analysis (Extended Data Fig. 1b). We construct the grid using the H3 hierarchical spatial indexing system, which is a geodesic discrete global grid designed to support multiscale spatial analysis through hexagonal cells ([Brodsky, 2018](#_ENREF_13_9)). Base-resolution H3 hexagons covering the study extent are obtained directly from the input datasets ([State Government of NSW and NSW Department of Planning Housing and Infrastructure, 2025](#_ENREF_13_57)), each identified by a unique h3 index, and subsequently aggregated into level-1 microcells by merging each hexagon with its six immediate neighbors sharing a common edge using parent–child relationships defined within the H3 framework. This aggregation produces spatial units with an effective radius of approximately 75 m, yielding a grid of 279,965 microcells covering the analyzed extent of Greater Sydney.

The choice of the level-1 microcell scale reflects both methodological and empirical considerations. At the base-hexagon resolution, proportional measures of tree canopy and built coverage are highly sensitive to fine-scale geometric variation, whereas aggregation to the microcell scale yields more stable and interpretable estimates. The resulting microcells align closely to neighborhood-scale spatial relationships observed between tree canopy cover and near-surface air temperature, while remaining sufficiently fine-grained to capture intra-urban heterogeneity ([Ziter et al., 2019](#_ENREF_13_73)). For analytical purposes, land cover, built form, and climate exposure are assumed to be approximately homogeneous within each microcell, which enables consistent spatial integration across datasets with differing native resolutions.

We derive baseline tree canopy conditions from the Greater Sydney Canopy Access 2022 dataset produced by the [State Government of NSW and NSW Department of Planning Housing and Infrastructure (2025)](#_ENREF_13_57). This dataset provides vegetation cover metrics in a hexagonal vector grid across the Greater Sydney region and classifies vegetation by height, with tree canopy defined as vegetation exceeding 3 m. Canopy cover is reported as the percentage of each hexagonal cell occupied by tree canopy. Because the dataset is supplied in a hexagonal grid compatible with the H3 base resolution, we calculate tree canopy percentage for each microcell as an area-weighted mean across all constituent base hexagons. These values represent baseline canopy access conditions and serve as the initial state for subsequent analyses.

We characterize baseline urban land development using the ESA WorldCover 2021 dataset ([Zanaga et al., 2022](#_ENREF_13_72)). This global land-cover product provides categorical classifications at 10 m spatial resolution, with each pixel assigned to one of 11 mutually exclusive land-cover classes defined under the Food and Agriculture Organization of the United Nations land cover classification system ([Di Gregorio, 2005](#_ENREF_13_15)). Among these classes, the “built-up” category identifies areas dominated by buildings, roads, and other impervious urban surfaces. We extract the built-up class and intersect it with the microcells. For each microcell, we calculate the proportion of area classified as built-up by summing the area of built-up pixels within the microcell and dividing by the total microcell area. This proportion represents the observed baseline urban land development state against which future urban land expansion scenarios are downscaled and evaluated.

Future urban land development projections, referred to here as projected built-up area, are obtained from the global 1-km downscaled urban land extent projection dataset developed by [Gao and Pesaresi (2021a](#_ENREF_13_21), [2021b)](#_ENREF_13_22). This dataset provides decadal projections of urban land fractions from 2000 to 2100 under five shared socioeconomic pathways (SSP1–SSP5). In this study, we use projections corresponding to SSP1, SSP2, and SSP5 for decadal periods beginning in 2040. The projections are supplied at a spatial resolution of approximately 1 km and represent the fraction of each grid cell classified as urban land. These projections form the basis for modeling future urban land development trajectories in Greater Sydney and are further downscaled to the microcell level.

Baseline building footprint is characterized using the Microsoft Bing Maps open building footprints dataset for Australia, which provides polygon geometries representing the spatial extent of individual buildings derived from automated extraction of high-resolution satellite imagery ([Microsoft, 2018](#_ENREF_13_45)). We align the building footprint layer with the microcell grid and calculate, for each microcell, the total area of building footprints contained within its boundary. This area is expressed as a proportion of total microcell area, yielding a baseline measure of building footprint coverage at the neighborhood scale. These estimates of baseline building footprint are subsequently combined with downscaled projections of urban land development under different SSPs to estimate future building footprint extents within each microcell and to inform upper bounds on feasible tree canopy expansion in future decades.

Projected climate data are obtained from the coupled model intercomparison project phase 6 (CMIP6) application-ready gridded datasets ([Irving et al., 2024](#_ENREF_13_34)). We use daily maximum near-surface air temperature (tasmax) projections for three emissions pathways corresponding to SSP1-2.6, SSP2-4.5, and SSP5-8.5. The datasets are provided at an approximate spatial resolution of 5 km and are generated using a statistical scaling approach that applies projected quantile changes from CMIP6 global climate models to high-quality observational baselines. For temperature, datasets scaled from the Australian gridded climate data (AGCD) observational product are used. A multi-model ensemble comprising eight CMIP6 global climate models is used to characterize uncertainty across climate responses. We extract daily tasmax projections for decadal years spanning 2040 to 2099, with values for 2099 used as a proxy for end-of-century (2100) conditions. Projected temperatures are then assigned to microcells and combined to construct ensemble estimates.

To ensure temporal consistency across datasets that are not observed in the same calendar year, we define a common baseline reference year. All baseline conditions are indexed to the year 2020, even though the underlying datasets are drawn from the closest available observation years spanning approximately 2018 to 2022. Future allocation decisions and regime simulations are subsequently evaluated at discrete decadal time steps from 2040 to 2100, consistent with the temporal resolution at which projected urban land development and climate data are available. All state variables and initial conditions used in the following analyses are indexed relative to this 2020 baseline unless stated otherwise.

## Spatio-temporal microcell panel

We transform the baseline microcell dataset into a fully specified spatio-temporal panel suitable for forward-looking analysis under alternative socioeconomic and climate futures. Observed baseline conditions are extended through projections that are internally consistent across space, time, and scenario. For each microcell we estimate future building footprint fractions for multiple decadal time steps under different shared socioeconomic pathways, derived from projected built-up area that is first downscaled from coarser spatial resolutions. In parallel, we assign downscaled and ensemble-averaged projections of daily maximum near-surface air temperature to each microcell for corresponding emissions pathways and target years.

### Downscaling projected urban land development

Urban land development projections were represented at three nested spatial scales. Global-scale projections were provided at a 5 km resolution under multiple SSPs. These projections were first downscaled to a 1 km grid using the method described in the source dataset and treated as fixed inputs in this study ([Gao & Pesaresi, 2021a](#_ENREF_13_21), [2021b](#_ENREF_13_22)). The present analysis further downscaled the 1 km projections to a microcell scale defined by approximately 75 m level-1 microcells spatial units covering the Greater Sydney region. All spatial operations were conducted using a consistent geographic coordinate reference system, and areas were computed using geodesic calculations to ensure metric consistency.

Because microcell boundaries do not generally align with the 1 km grid, individual microcells may overlap multiple 1 km grid cells. To accommodate this, each microcell was partitioned into one or more spatially contiguous sub-polygons (pieces), each uniquely associated with a single parent 1 km grid cell. All allocation operations were performed at the piece level, with parent grid membership preserved throughout the allocation process. Final microcell-level values were obtained by aggregating allocations across all pieces belonging to the same microcell.

Let index 1 km grid cells and index decadal time steps. Let denote the fraction of built-up land in grid cell at the beginning of decade , and let denote the physical area of grid cell . The decadal increase in built-up area within grid cell was calculated as

|  |  | (1) |
| --- | --- | --- |

Only positive values of were considered. If the projected change was zero or negative, no allocation was performed for that grid cell during the corresponding decade.

For each microcell piece , total area , built-up area at the beginning of decade , , and maximum developable land area were defined. The remaining developable capacity at the beginning of the decade was given by

|  |  | (2) |
| --- | --- | --- |

Initial built-up area values were derived from the ESA WorldCover 2021 dataset by extracting pixels classified as “Built-up” and intersecting them with the microcell geometries ([Zanaga et al., 2022](#_ENREF_13_72)). For each microcell, the total area of intersecting built-up pixels was calculated using geodesic area measurements and expressed as a proportion of the total microcell area. These proportions were converted to absolute built-up areas and assigned to all constituent microcell pieces in proportion to their areas.

Microcell pieces were grouped by their parent 1 km grid cell. Let denote the set of microcells spatially contained within grid cell . All allocation operations were performed independently within each , and no redistribution across grid cell boundaries was allowed.

Within each grid cell and decade, allocation weights were defined based on the built-up area at the beginning of the decade. For microcell , the weight was computed as

|  |  | (3) |
| --- | --- | --- |

If the denominator was zero, indicating that no microcell piece within the grid cell had existing built-up area, weights were instead defined using remaining developable capacity,

|  |  | (4) |
| --- | --- | --- |

Weights were normalized to sum to one within each grid cell.

An initial allocation of built-up area to microcell pieces was computed as

|  |  | (5) |
| --- | --- | --- |

This allocation was subject to a capacity constraint such that . If the initial allocation exceeded available capacity, it was capped at , and the excess amount was recorded as overflow. Total overflow within grid cell at iteration zero was defined as the sum of excess allocations across all microcell pieces in .

Overflow was redistributed iteratively among pieces with remaining capacity. At iteration , remaining capacity was defined as

|  |  | (6) |
| --- | --- | --- |

Redistribution weights were proportional to remaining capacity,

|  |  | (7) |
| --- | --- | --- |

where denotes the subset of pieces with positive remaining capacity at iteration . Additional allocation at each iteration was computed as the minimum of the proposed share and remaining capacity. Iterations continued until either all overflow was absorbed or no remaining capacity existed within the grid cell.

The total allocation to microcell piece during decade was obtained by summing allocations across all iterations. Built-up area was updated at the end of each decade according to

|  |  | (8) |
| --- | --- | --- |

Updated values were then aggregated across all pieces belonging to the same microcell to obtain microcell-level built-up areas and were used as inputs for the subsequent decadal allocation step.

For each grid cell and decade, the procedure conserves total allocated built-up area up to the limit imposed by microcell-level developable capacity. If the sum of remaining capacities within a grid cell was insufficient to absorb the projected increase , the unallocated remainder was discarded and not transferred to neighbouring grid cells. The resulting outputs consist of decadal trajectories of built-up area at the microcell scale that preserve the spatial and temporal structure of the 1 km urban projections while enforcing microcell-specific capacity constraints.

### Estimating future building footprint

This step uses the decadal microcell built-up land fractions produced by the preceding downscaling algorithm as inputs and translates them into SSP-specific trajectories of building footprint fraction. Let microcells be indexed by and decadal time steps by . Let denote the building footprint fraction in microcell at the beginning of decade , consistent with the notation used in the canopy allocation framework. Let denote the built-up land fraction in microcell at the beginning of decade under socio-economic pathway *s* ∈ {SSP1, SSP2, SSP5} where for is taken directly from the microcell scale downscaled urban land development outputs. Observed building footprints provide the initial condition , and observed baseline built-up land provides . We enforce the physical constraint for all .

To update building footprints as built-up land expands or contracts, we represent local development intensity through a footprint density ratio computed from the previous decade,

|  |  | (9) |
| --- | --- | --- |

where is a small threshold that avoids instability when built-up land is negligible. The density ratio is bounded to [0, 1] and can be interpreted as the share of built-up land occupied by building footprints in microcell at the previous decade.

For each pathway , we initialise and , then propagate sequentially for all available projected decades. At each decade, we compare the new built-up fraction to the previous value and update footprints according to three cases.

If built-up land remains unchanged within tolerance, building footprints are carried forward unchanged:

|  |  | (10) |
| --- | --- | --- |

If built-up land decreases, footprints contract proportionally to preserve the previous decade density:

|  |  | (11) |
| --- | --- | --- |

If built-up land increases, we distinguish between microcells that have previously exhibited non zero building footprint and those that have not. Define an indicator that equals 1 if for any , and 0 otherwise. For microcells with development history , expansion follows the microcell’s own realized density and Equation (11) is applied unchanged, using computed from the microcell’s previous decade state.

For microcells that experience built-up land expansion without any prior building footprint history , the density ratio cannot be inferred locally. In these cases, we estimate a neighbourhood density using the H3 adjacency structure. Let denote the set of microcells within H3 grid distance of microcell , excluding itself, and let denote the maximum search radius. We identify the smallest radius *r** ∈ {1, …, *R*}

for which at least one neighbor satisfies . The neighbourhood density is then defined as the mean of neighbour densities at that radius,

|  |  | (12) |
| --- | --- | --- |

If no neighbors with exist within , we assign a conservative default density . Newly developing microcells are then updated as

|  |  | (13) |
| --- | --- | --- |

with given by Equation (12) when neighborhood information exists and by otherwise. After each update, is bounded to [0, 1] and the constraint is enforced.

The procedure is applied independently under SSP1, SSP2, and SSP5, ensuring that pathway specific differences in building footprints arise solely from differences in the downscaled built-up land trajectories. For transparency, we record diagnostic metadata at each decade indicating whether was carried forward, derived from the microcell’s own density, inferred from neighborhood density, or assigned using the default density, together with the neighborhood radius used for inference. These diagnostics support auditing of when footprint estimates rely on local history versus spatial borrowing during newly developing phases.

### Downscaling and ensembling climate projections

Daily maximum near-surface air temperature projections, tasmax, are downscaled from gridded CMIP6 application-ready datasets to the microcell scale and subsequently combined into multi-model ensemble estimates. The procedure preserves the native daily temporal resolution of the climate projections while providing spatially explicit temperature time-series for each microcell in the study area.

Projected tasmax values are provided at an approximate spatial resolution of 5 km. To assign these projections to microcells, we adopt a centroid-based nearest-neighbor sampling approach. Each microcell is represented by its geometric centroid, and daily temperature values are assigned by selecting the tasmax value from the nearest climate grid cell to that centroid for each day. Formally, for microcell and day , the assigned temperature is given by

|  |  | (14) |
| --- | --- | --- |

where denotes the daily maximum temperature of the climate grid cell closest to the centroid of microcell . No spatial interpolation or sub-grid averaging is applied. Consequently, microcells located within the same climate grid cell receive identical daily temperature values, and no artificial spatial variability is introduced beyond that resolved by the climate data. This procedure is applied independently for each climate model, emissions pathway, and target year, producing model-specific daily temperature time-series at the microcell level.

To characterize uncertainty across climate responses, we construct a multi-model ensemble using eight CMIP6 global climate models. For each emissions pathway and target year, daily tasmax projections from all models are combined at the microcell level, producing model-aligned daily temperature time-series for each spatial unit. For subsequent modelling, we use only the ensemble mean of daily maximum temperature. This ensemble mean is aggregated across all days in a given year to obtain a single annual average daily maximum temperature for each microcell, emissions pathway, and target year.

## Adaptation regime design

We adopt a structured experimental design that separates exogenous future conditions from endogenous procedural choices, and further distinguishes between normative prioritization, allocation timeline, and budget availability. This separation is essential for identifying when and how lock-ins emerge, and for avoiding conflation between uncertainty, values, and policy intervention. In the regime framework, SSP–RCP scenarios define external conditions that shape the decision space for adaptation, rather than choices that can be revised or shifted by local decision makers. Justice principles, allocation timelines, and total canopy budgets, by contrast, represent policy constraints on budget availability that structure how adaptation unfolds within those external conditions.

### Exogenous futures and constrained decision spaces

We represent future climate and urban development conditions using three coupled SSP–RCP scenarios: SSP1–2.6, SSP2–4.5, and SSP5–8.5. These scenarios jointly determine two time-varying constraints on adaptation. First, they determine trajectories of urban land development, which are downscaled to the microcell level and translated into projected building footprint fractions. As built-up land expands, the feasible space for tree canopy contracts, and previously established canopy may be lost when built expansion exceeds local capacity. These changes directly affect the maximum attainable canopy fraction in each microcell at each decade. Second, SSP–RCP scenarios determine projected heat exposure through decadal estimates of annual mean daily maximum near-surface air temperature. These projections do not influence feasibility directly, but they condition priority under the prioritarian justice principle by identifying which neighborhoods are most exposed to heat at each decision point.

Crucially, SSP–RCP scenarios define exogenous trajectories of climate and urban development. They evolve independently of local adaptation actions and cannot be altered by reallocating canopy. Their role in the analysis is to progressively reshape the physical and climatic context within which adaptation decisions are made, thereby influencing the consequences and reversibility of those decisions. Lock-in is therefore not attributed to the choice of an SSP–RCP, but to how procedural decisions interact with the constraints those futures impose.

### Procedural choices: justice principles and allocation timelines

Within each SSP–RCP scenario, we model adaptation as a sequence of decadal decisions about where and when to allocate tree canopy. Two distinct types of procedural choice structure this sequence.

The first is normative prioritization, represented by three justice principles: utilitarian, sufficientarian, and prioritarian. These principles determine how available canopy resources are distributed across microcells within a given decade, conditional on the current state of the system and the remaining feasible capacity. Justice principles are held fixed within each model run, reflecting sustained normative commitments rather than ad hoc reallocations.

The second is temporal sequencing, represented by alternative allocation timelines that determine how a fixed total canopy budget is distributed over time. We define four distinct allocation timelines that describe how the total available tree canopy is deployed across the planning horizon: a linear timeline with uniform allocation over time, an early-heavy timeline that front-loads allocation, a late-heavy timeline that defers allocation to later decades, and a mid-heavy timeline that concentrates allocation around mid-century (Extended Data Fig. 2a). We evaluate cumulative allocations at discrete decadal time points, reflecting the temporal resolution at which allocation outcomes are analyzed in this study and excluding intermediate years that are not explicitly assessed (Extended Data Fig. 2b). Total budget availability varies across a wide range of cumulative levels, while maintaining the same timeline shapes. Once allocated, the canopy is assumed to persist in subsequent periods, so that cumulative allocation at any point reflects all prior allocations and the sequential structure of decisions over time.

Each timeline specifies the timing of budget availability across decades, independent of where those resources are ultimately allocated. By separating allocation timelines from normative prioritization, we isolate the procedural effects of early versus delayed commitment while holding justice principles constant. Such distinction is central to the analysis of lock-in. Because canopy allocation is cumulative and subject to feasibility constraints that evolve over time, early allocations influence not only current outcomes but also the marginal effectiveness and feasibility of future allocations. Allocation timelines therefore govern when commitments are made and how rapidly the decision space contracts, even when later decision makers face the same justice principles and nominal budget availability.

### Budget availability as an intervention constraint

In addition to allocation timelines and prioritization, we vary the total cumulative canopy budget available by 2100 across a wide range of values, from 25 million to 4 billion square meters of tree canopy. Total budget represents a policy-relevant intervention parameter that constrains the upper bound of achievable canopy expansion over the planning horizon, but does not constitute a regime in itself. For a given regime shape, changing the total budget scales the magnitude of decadal allocations without altering their temporal profile (Extended Data Fig. 2a).

Varying total canopy budgets serves two purposes. Substantively, it allows us to examine adaptation outcomes under both resource scarcity and relative abundance. Analytically, it provides a critical test of procedural lock-in. If lock-in were driven solely by insufficient resources, increasing total budgets would eliminate or substantially weaken it. By contrast, persistence of lock-in effects across high-budget regimes indicates that early procedural commitments, rather than scarcity alone, constrain future choices.

### Sequential implementation and experimental design

Each model run is defined by a unique combination of SSP–RCP scenario, justice principle, allocation timeline, and total canopy budget. Starting from observed baseline canopy conditions in 2020, the system is updated sequentially at decadal decision points (2040, 2050, 2060, 2070, 2080, 2090, and 2100; Extended Data Fig. 2b). At the beginning of each decade, feasible canopy bounds are updated based on projected building footprints and land-use-specific canopy limits, and any forced canopy losses are applied. The decade-specific canopy budget is then allocated according to the selected justice principle, yielding the canopy state carried forward to the next decision point.

All runs share identical spatial units, feasibility constraints, and state update rules. Differences in outcomes therefore arise solely from differences in exogenous futures, normative prioritization, allocation timeline, and budget availability. This factorial design enables direct comparison of adaptation regimes with identical cumulative resources but different sequencing, and of justice principles operating under identical external conditions. Lock-in is identified not as an assumed property of any single regime, but as an emergent feature of sequential decision making under evolving constraints.

## Operationalization of justice theories

We operationalize three justice principles for allocating tree canopy, including utilitarian, sufficientarian, and prioritarian, within a common analytical framework. All three logics operate over the same spatial units, state variables, feasibility constraints, and temporal updating structure, and differ only in the rule used to prioritize allocations across microcells. This shared structure enables direct comparison of justice logics without confounding differences in physical constraints or system dynamics.

Let microcells be indexed by and decadal time steps by . Let denote the tree canopy fraction in microcell at the beginning of decade , denote microcell area, and denote the building footprint fraction. Canopy allocation is subject to biophysical and land-use constraints common to all justice logics. Canopy cannot exceed available non-built land, given by , and is further constrained by land-use-specific structural limits. Each microcell is assigned a dominant land-use category, and the maximum observed baseline canopy fraction in 2020 within that category defines an empirical upper bound . The feasible canopy fraction at time is therefore

|  |  | (15) |
| --- | --- | --- |

If existing canopy exceeds this bound due to built expansion, canopy loss is enforced prior to allocation. Let

|  |  | (16) |
| --- | --- | --- |

denote the canopy fraction after any enforced loss. All allocations described below operate on and respect the remaining feasible capacity .

At each decade, a fixed canopy area budget is available for allocation. Canopy added during decade is denoted , and canopy fractions are updated consistently across all justice logics as

|  |  | (17) |
| --- | --- | --- |

with the resulting distribution serving as the initial condition for the subsequent decade.

### Utilitarian

We operationalize utilitarian justice as an efficiency-based allocation principle in which canopy resources are distributed to maximize aggregate daytime cooling across the urban system. Under this interpretation, justice is defined in terms of total welfare: each unit of canopy is allocated to the location where it yields the greatest marginal reduction in daytime temperature anomaly per unit area, subject to the feasibility constraints defined above.

To represent marginal cooling benefits, we draw on the empirically estimated canopy–temperature relationship reported by [Ziter et al. (2019)](#_ENREF_13_73), which quantifies nonlinear and scale-dependent interactions between tree canopy and daytime summer air temperature using mobile measurements in Madison, Wisconsin. We reproduce the reported 90 m neighborhood-scale response using the original data and model specification and extract the partial effect of canopy cover while holding other covariates constant. This yields a smooth empirical response defined over canopy fractions , where more negative values indicate greater cooling. Because Madison and Greater Sydney differ in climate, vegetation composition, urban form, and background meteorology, we do not interpret this relationship as a transferable predictor of absolute temperature change. Instead, the reproduced response is treated as an empirical summary of the nonlinear canopy–cooling relationship identified in that study and is used solely to rank relative marginal cooling benefits across locations with different baseline canopy levels.

For numerical optimization, is approximated by a low-dimensional polynomial surrogate. This approximation serves only as a numerical device that enables marginal cooling to be evaluated at arbitrary canopy fractions during optimization; its coefficients are not interpreted physically, and allocation outcomes do not depend on their exact values. To eliminate numerical artefacts introduced by polynomial fitting, we enforce a monotone non-increasing envelope on the fitted response. Let denote the polynomial approximation. Evaluated on a dense grid , the response used in optimization is defined as

|  |  | (18) |
| --- | --- | --- |

with linear interpolation used for intermediate values. This construction ensures that increasing canopy fraction never increases the temperature anomaly score. The resulting function is used only to evaluate relative cooling gains and is not interpreted as a transferable predictor of absolute temperature change.

Given current feasible canopy levels, the total cooling gain available in microcell if filled to capacity is

|  |  | (19) |
| --- | --- | --- |

and the remaining plantable canopy area is . We define marginal cooling efficiency as cooling gain per unit canopy area,

|  |  | (20) |
| --- | --- | --- |

Canopy is allocated greedily in descending order of until the budget is exhausted or no remaining capacity exists. Because the utilitarian objective is additive across microcells and represents marginal benefit per unit area, this procedure yields the utilitarian optimum under the adopted response shape and constraints. Throughout, the canopy–temperature function is used only to compare relative cooling benefits under alternative allocations, and resulting canopy distributions should be interpreted as efficiency-maximizing outcomes under a utilitarian justice principle rather than as predictions of realized air temperatures.

### Sufficientarian

We operationalize sufficientarian justice as a threshold-oriented allocation rule for tree canopy, in which priority is given to ensuring that all neighborhoods attain an adequate minimum level of canopy cover before additional resources are allocated elsewhere. The sufficientarian logic is informed by the 3-30-300 rule, and in particular by its emphasis that neighborhoods should achieve approximately 30% tree canopy cover as a baseline condition for urban livability ([Browning et al., 2024](#_ENREF_13_10); [Konijnendijk, 2023](#_ENREF_13_36)). Because the 3-30-300 rule is articulated using indicators and spatial units that differ from our microcell representation, we do not impose a fixed 30% target directly. Instead, we adopt the normative structure of the rule by operationalizing sufficiency as the progressive reduction of canopy shortfall in low-canopy neighborhoods toward a common minimum level that is determined endogenously by resource and feasibility constraints.

Given the post-loss canopy state and feasible maximum , the sufficientarian allocator distributes the available budget by progressively raising the lowest-canopy microcells first, independent of cooling efficiency or heat exposure. Allocation proceeds according to a progressive filling (water-filling) rule widely used in max–min fairness problems ([Bertsekas & Gallager, 2021](#_ENREF_13_4); [Radunovic & Le Boudec, 2007](#_ENREF_13_50)). Operationally, a target canopy level is identified such that canopy in each microcell is increased toward . The canopy increment is given by

|  |  | (21) |
| --- | --- | --- |

subject to the area canopy budget constraint

|  |  | (22) |
| --- | --- | --- |

The value of is determined endogenously at each decade so that the available canopy budget is fully utilized whenever sufficient remaining capacity exists. If the canopy budget is insufficient to raise all microcells to a common level, it is fully absorbed by the lowest-canopy microcells. If the canopy budget exceeds remaining capacity, all microcells saturate at their feasible maxima.

### Prioritarian

We operationalize prioritarian justice as a heat-exposure-weighted allocation rule in which priority is given to neighborhoods facing higher thermal exposure. Under this interpretation, justice assigns greater moral weight to improvements in worse-off conditions. Here, “worse off” is defined operationally as higher projected daytime heat exposure, represented by the annual mean daytime air temperature anomaly . The prioritarian allocation uses solely to establish priority ordering; it does not enter the allocation magnitude directly.

Given the post-loss canopy state and feasible maximum , the available canopy budget is allocated by ranking microcells in descending order of and serving hotter microcells first. To ensure equitable treatment among microcells experiencing similar heat exposure, allocation proceeds in groups with approximately equal , referred to as heat bands.

For each heat band, the allocator first determines whether the remaining canopy budget is sufficient to fill all microcells in the band to their feasible canopy limits. If sufficient, canopy is added until for all microcells in the band. If insufficient, the remaining canopy budget is distributed uniformly across the band by applying a common canopy fraction increment , capped by each microcell’s remaining capacity. The resulting increment is

|  |  | (23) |
| --- | --- | --- |

where is chosen such that the total canopy area added across the band matches the remaining budget as closely as possible. Once this partial-band allocation is completed, the budget for decade is exhausted.

Although the prioritarian allocation rule depends only on heat exposure ordering, we evaluate the thermal implications of the resulting canopy distributions using the same canopy–temperature response function employed in the utilitarian analysis. This ensures that cooling outcomes remain directly comparable across justice logics while keeping the prioritarian allocation rule itself strictly defined by concern for the most heat-exposed neighborhoods.

## Regime shift and lock-in analysis

We conceptualize lock-in as an emergent property of sequential allocation decisions under evolving feasibility constraints, in which early procedural choices shape the regime of the system and progressively constrain the outcomes achievable under alternative decision rules. In this study, lock-in is defined as the cumulative divergence between a realized trajectory and the counterfactual trajectory that would have emerged under a different procedural rule from the outset. This perspective draws on path-dependence theory, where early commitments restructure future option sets ([Unruh, 2000](#_ENREF_13_64)), and on analyses of infrastructure and carbon lock-in that highlight how long-lived spatial allocations generate inertia in socio-technical systems ([Seto et al., 2016](#_ENREF_13_56)). Methodologically, we adopt an adaptation regimes perspective, evaluating how decision options evolve through time and how shifting actions perform under progressively tightening constraints ([Haasnoot et al., 2020](#_ENREF_13_26); [Haasnoot et al., 2013](#_ENREF_13_28)).

To isolate this effect, we construct controlled regime shift experiments across all combinations of justice principles and allocation timelines. Each experiment compares three trajectories. The first is a baseline no-shift regime, in which a fixed adaptation regime governs all allocation decisions from 2040 to 2100. The second is a target no-shift counterfactual regime, in which an alternative procedural decision rule is applied over the entire horizon. The third is a shifted regime, in which the system follows the baseline adaptation regime up to a specified shifting year and then adopts the target adaptation regime for all subsequent decisions. Shifting decisions are implemented at decadal decision points *s* ∈ {2040, 2050, 2060, 2070, 2080, 2090}. Because allocations made at decade *s* determine the system state observed in the subsequent decade, the effects of shifting are manifested in *t* ∈ {2050, 2060, 2070, 2080, 2090, 2100}.

At the moment of shifting, past allocations are treated as sunk, and the remaining canopy budget is reallocated across the remaining decades according to the allocation timeline of the target adaptation regime. This reproduces the sequential decision logic implemented in the simulation code, where allocation timelines are dynamically replanned conditional on prior commitments.

Lock-in is measured as the cumulative divergence between the realized shifted trajectory and the corresponding no-shift counterfactual trajectory. For a given system state metric (e.g., canopy evenness or built-weighted canopy evenness), the lock-in cost associated with shifting at year is defined as the integrated difference between trajectories over time,

|  |  | (24) |
| --- | --- | --- |

where is the state under the shifted regime and is the corresponding counterfactual state under the target regime. This quantity is expressed in percentage-point years, capturing both the magnitude and persistence of divergence. This formulation allows lock-in to be evaluated consistently across all regime transitions, canopy budgets, and SSP–RCP scenarios.

## Analytical decomposition of adaptation lock-in

We examine how sequential decisions reshape the structure of the decision space through time to explain why delayed shift generates persistent divergence between adaptation regimes. Adaptation lock-in arises because each allocation modifies both the distribution of existing canopy and the spatial configuration of remaining feasible capacity, thereby conditioning the options available to subsequent decisions.

In our framework, lock-in is not driven by exogenous constraints alone, but by the interaction between evolving feasibility conditions and the cumulative effects of prior allocations. Early decisions establish spatial commitments that cannot be strategically withdrawn within the model, while feasibility constraints evolve independently through urban development and land-use limits. Together, these processes produce a path-dependent system in which later decision rules operate on an inherited and increasingly structured landscape.

All calculations use the same microcell state variables and feasibility constraints defined in Equations (15) to (17). At each decision decade , the maximum feasible canopy fraction in microcell is (Equation (15)). If built expansion reduces feasibility below the realized canopy level, canopy is reduced to the post-loss state (Equation (16)) prior to allocation. The system is then updated by allocating increments , and the canopy state is propagated forward (Equation (17)).

We characterize adaptation lock-in using two complementary components: (i) regime-shift-based divergence diagnostics and (ii) evolving feasibility conditions that structure the decision space.

### Regime shift experiments and lock-in diagnostics

To examine how evolving feasibility conditions shape persistent effects under procedural change, we conduct one-shift experiments that emulate a single mid-course policy shift at a chosen decision decade. This design follows the adaptation regimes tradition, which evaluates how shifting actions perform as conditions evolve and option spaces progressively change ([Haasnoot et al., 2020](#_ENREF_13_26); [Haasnoot et al., 2013](#_ENREF_13_28)). In each experiment, we fix an SSP–RCP scenario, which defines the exogenous climate and urban development trajectories and hold the total cumulative canopy budget constant over the 2040–2100 horizon. We then define a baseline adaptation regime, defined by a justice principle and an allocation timeline, which governs allocations from 2040 up to the shifting year. From the shift year onward, allocations follow a target adaptation regime, again defined by a justice principle and an allocation timeline. Shifting is evaluated at year *s*. Differences between shifted outcomes and their corresponding no-shift counterfactual trajectories are interpreted as evidence of adaptation lock-in arising from sequential commitments under evolving feasibility conditions.

Let denote the canopy fraction produced by simulating the system under the baseline adaptation regime up to shifting year , then under the target adaptation regime thereafter, using the same feasibility updates (Equations (15) to (17)). To isolate procedural effects from changes in total resources, we hold the total canopy budget fixed and replan only the remaining budget after the shift across the remaining decades according to the target regime logic. This reproduces the shifting logic in the code: past expenditure implied by the baseline adaptation regime is treated as sunk, and the remaining allocation timeline is rescaled over the remaining planning horizon.

For each target adaptation regime, we also simulate a no-shift counterfactual regime , in which the target procedural decision rule is applied over the entire horizon. We then evaluate the effects of shifting using three complementary diagnostics, all normalized by a fixed scalar . In the main specification, , which expresses mismatches as a share of the total canopy budget and yields dimensionless values that are comparable across budgets.

Metric 1, unattainable shortfall at 2100. We first quantify the extent to which divergence is driven by binding feasibility constraints at the end of the planning horizon. While shifting may generate differences relative to the target regime, not all such differences are structurally irreversible. This metric isolates the portion of the target shortfall that cannot be closed even if all remaining feasible capacity at 2100 were fully utilized. Define the target shortfall in canopy area as

|  |  | (25) |
| --- | --- | --- |

and the remaining addable area at 2100 under the shifted outcome as

|  |  | (26) |
| --- | --- | --- |

The unattainable component is then

|  |  | (27) |
| --- | --- | --- |

A positive value indicates that, even with full use of remaining capacity, the target distribution cannot be reached because feasible space has been exhausted or eliminated. This metric therefore captures lock-in that arises from hard feasibility limits rather than from procedural sequencing alone.

Metric 2, Premature commitment at the shift moment. We next quantify how early allocations shape the inherited system state at the moment of shifting. Shifting can generate persistent divergence because the baseline regime may allocate canopy to locations that the target rule would not have prioritized, creating sunk distributional commitments. Let denote the pre-shift decade. Premature commitment is defined as

|  |  | (28) |
| --- | --- | --- |

This metric measures the canopy area allocated above the target counterfactual prior to the shift. Because canopy cannot be directly withdrawn within the model, except through forced losses induced by feasibility contraction, such over-allocation constrains subsequent reallocation and can propagate divergence even when sufficient aggregate capacity remains.

Metric 3, Regime shift irreversibility at 2100. We measure the aggregate divergence between the shifted regime and the target counterfactual at the end of the planning horizon,

|  |  | (29) |
| --- | --- | --- |

A positive value indicates that, even after adopting the target procedural rule at , the final distribution differs from what would have been achieved if the target rule had been applied from the outset. This metric summarizes the cumulative effects of both early commitments and feasibility constraints on the final spatial configuration.

Across all shift years, justice principles, adaptation regimes, canopy budgets, and SSP–RCP scenarios, these three metrics provide a structured account of adaptation lock-in. Metric 1 isolates divergence that is structurally unattainable due to binding feasibility constraints, Metric 2 captures premature spatial commitments inherited from earlier decisions, and Metric 3 summarizes the cumulative divergence that persists to the end of the horizon. Together, they characterize lock-in as the outcome of sequential commitments interacting with evolving constraints, consistent with broader analyses of limited back-adjustment capacity in climate action systems ([Le Quéré et al., 2026](#_ENREF_13_38)). To interpret the sources of divergence identified by these diagnostics, we next examine how sequential allocation reshapes the structure of the decision space over time.

### Decision space contraction and spatial constraints

We first quantify how the feasible option space evolves under sequential allocation. The remaining feasible canopy capacity in microcell at decade is

|  |  | (30) |
| --- | --- | --- |

From , we then compute three decision space contraction metrics, reported for each decade , SSP–RCP scenario, justice principle, allocation timeline, and canopy budget.

Total remaining capacity. The total remaining feasible canopy area is

|  |  | (31) |
| --- | --- | --- |

Declines in indicate contraction of the feasible option space available to future decision makers, whether due to built expansion, land use limits, or saturation from prior allocations.

Forced canopy losses. Built expansion can invalidate previously achieved canopy levels by reducing below existing canopy. The enforced loss in microcell at decade is

|  |  | (32) |
| --- | --- | --- |

where denotes the realized canopy fraction immediately before applying feasibility updates for decade , consistent with the sequential update in Equations (15) to (17). Forced loss captures an irreversible mechanism that is external to procedural choice: once canopy is removed because feasibility contracts, recovery must compete with future canopy budgets and remaining capacities and may be impossible where feasibility remains binding.

*Remaining capacity concentration.* Even when aggregate remaining capacity is nonzero, later correction can be limited if remaining capacity is concentrated in a small subset of microcells. We therefore characterize the distribution of {} using the Gini coefficient as

|  |  | (33) |
| --- | --- | --- |

Higher indicates that remaining feasible action becomes increasingly uneven across space, which restricts the set of achievable distributions and increases the risk that mismatches cannot be corrected in the locations where the alternative procedural rule would prioritize intervention.

These diagnostics describe how the decision space is progressively structured by prior allocations and external constraints. Importantly, they do not define lock-in directly, but characterize the conditions under which lock-in emerge

# References

Aksom, H. (2022). Institutional inertia and practice variation. *Journal of Organizational Change Management*, *35*(3), 463-487.

Barnett, J., Evans, L. S., Gross, C., Kiem, A. S., Kingsford, R. T., Palutikof, J. P., Pickering, C. M., & Smithers, S. G. (2015). From barriers to limits to climate change adaptation: path dependency and the speed of change. *Ecology and Society*, *20*(3).

Berkhout, F., & Dow, K. (2023). Limits to adaptation: Building an integrated research agenda. *Wiley Interdisciplinary Reviews: Climate Change*, *14*(3), e817.

Bertsekas, D., & Gallager, R. (2021). *Data networks*. Athena Scientific.

Bhave, A. G., Conway, D., Dessai, S., & Stainforth, D. A. (2016). Barriers and opportunities for robust decision making approaches to support climate change adaptation in the developing world. *Climate Risk Management*, *14*, 1-10.

Blader, S. L., & Tyler, T. R. (2003). A four-component model of procedural justice: Defining the meaning of a “fair” process. *Personality and social psychology bulletin*, *29*(6), 747-758.

Bopp, J., & Bercht, A. L. (2021). Considering time in climate justice. *Geographica Helvetica*, *76*(1), 29-46.

Brink, E., Falla, A. M. V., & Boyd, E. (2023). Weapons of the vulnerable? A review of popular resistance to climate adaptation. *Global environmental change*, *80*, 102656.

Brodsky, I. (2018). *H3: Uber’s Hexagonal Hierarchical Spatial Index*. Retrieved 29 January 2026 from <https://www.uber.com/en-AU/blog/h3/>

Browning, M., Locke, D. H., Konijnendijk, C., Labib, S., Rigolon, A., Yeager, R., Bardhan, M., Berland, A., Dadvand, P., & Helbich, M. (2024). Measuring the 3-30-300 rule to help cities meet nature access thresholds. *Science of the Total Environment*, *907*, 167739.

Buurman, J., & Babovic, V. (2016). Adaptation Pathways and Real Options Analysis: An approach to deep uncertainty in climate change adaptation policies. *Policy and Society*, *35*(2), 137-150.

Cosens, B. A., Craig, R. K., Hirsch, S. L., Arnold, C. A. T., Benson, M. H., DeCaro, D. A., Garmestani, A. S., Gosnell, H., Ruhl, J., & Schlager, E. (2017). The role of law in adaptive governance. *Ecology and society: a journal of integrative science for resilience and sustainability*, *22*(1), 1.

Cradock-Henry, N. A., Blackett, P., Hall, M., Johnstone, P., Teixeira, E., & Wreford, A. (2020). Climate adaptation pathways for agriculture: Insights from a participatory process. *Environmental science & policy*, *107*, 66-79.

de Ridder, K., Schultz, F. C., & Pies, I. (2023). Procedural climate justice: Conceptualizing a polycentric solution to a global problem. *Ecological economics*, *214*, 107998.

Di Gregorio, A. (2005). *Land cover classification system: classification concepts and user manual: LCCS* (Vol. 8). Food & Agriculture Org.

Dittrich, R., Wreford, A., & Moran, D. (2016). A survey of decision-making approaches for climate change adaptation: Are robust methods the way forward? *Ecological economics*, *122*, 79-89.

Doorn, N. (2025). Assessing risk management interventions from the perspective of intergenerational justice: preserving options and avoiding irreversible planetary loss. *Journal of Risk Research*, 1-18.

Eakin, H., Keele, S., & Lueck, V. (2022). Uncomfortable knowledge: mechanisms of urban development in adaptation governance. *World development*, *159*, 106056.

Eriksen, S., Schipper, E. L. F., Scoville-Simonds, M., Vincent, K., Adam, H. N., Brooks, N., Harding, B., Lenaerts, L., Liverman, D., & Mills-Novoa, M. (2021). Adaptation interventions and their effect on vulnerability in developing countries: Help, hindrance or irrelevance? *World development*, *141*, 105383.

Fortin, M., Cojuharenco, I., Patient, D., & German, H. (2016). It is time for justice: How time changes what we know about justice judgments and justice effects. *Journal of Organizational Behavior*, *37*, S30-S56.

Gao, J., & Pesaresi, M. (2021a). Downscaling SSP-consistent global spatial urban land projections from 1/8-degree to 1-km resolution 2000–2100. *Scientific Data*, *8*(1), 281.

Gao, J., & Pesaresi, M. (2021b). *Global 1-km Downscaled Urban Land Extent Projection and Base Year Grids by SSP Scenarios, 2000–2100* NASA Socioeconomic Data and Applications Center (SEDAC). <https://doi.org/https://doi.org/10.7927/1z4r-ez63>

Geels, F. W. (2010). Ontologies, socio-technical transitions (to sustainability), and the multi-level perspective. *Research policy*, *39*(4), 495-510.

Gillespie, J., Penny, D., & Hamilton, R. (2025). Time, justice, and urban nature: procedural barriers to multi-species flourishing. *npj Urban Sustainability*, *5*(1), 17.

Groen, L., Alexander, M., King, J. P., Jager, N. W., & Huitema, D. (2023). Re-examining policy stability in climate adaptation through a lock-in perspective. *Journal of European Public Policy*, *30*(3), 488-512.

Haasnoot, M., Biesbroek, R., Lawrence, J., Muccione, V., Lempert, R., & Glavovic, B. (2020). Defining the solution space to accelerate climate change adaptation. *Regional environmental change*, *20*(2), 37.

Haasnoot, M., Di Fant, V., Kwakkel, J., & Lawrence, J. (2024). Lessons from a decade of adaptive pathways studies for climate adaptation. *Global environmental change*, *88*, 102907.

Haasnoot, M., Kwakkel, J. H., Walker, W. E., & Ter Maat, J. (2013). Dynamic adaptive policy pathways: A method for crafting robust decisions for a deeply uncertain world. *Global environmental change*, *23*(2), 485-498.

Hanger-Kopp, S., Thaler, T., Seebauer, S., Schinko, T., & Clar, C. (2022). Defining and operationalizing path dependency for the development and monitoring of adaptation pathways. *Global environmental change*, *72*, 102425.

Hetz, K., & Bruns, A. (2014). Urban planning lock-in: implications for the realization of adaptive options towards climate change risks. *Water International*, *39*(6), 884-900.

Holland, B. (2017). Procedural justice in local climate adaptation: political capabilities and transformational change. *Environmental Politics*, *26*(3), 391-412.

Huitema, D., Adger, W. N., Berkhout, F., Massey, E., Mazmanian, D., Munaretto, S., Plummer, R., & Termeer, C. C. (2016). The governance of adaptation: choices, reasons, and effects. Introduction to the Special Feature. *Ecology and Society*, *21*(3).

Hurlbert, M., & Gupta, J. (2015). The split ladder of participation: A diagnostic, strategic, and evaluation tool to assess when participation is necessary. *Environmental science & policy*, *50*, 100-113.

Irving, D., Macadam, I., & King, M. (2024). *Application-ready quantile-delta-change (QDC) scaled CMIP6 climate projections for Australia (global warming levels, 5km grid)*. <https://doi.org/10.25919/mywe-tz19>

Juhola, S., Heikkinen, M., Pietilä, T., Groundstroem, F., & Käyhkö, J. (2022). Connecting climate justice and adaptation planning: An adaptation justice index. *Environmental science & policy*, *136*, 609-619.

Konijnendijk, C. C. (2023). Evidence-based guidelines for greener, healthier, more resilient neighbourhoods: Introducing the 3–30–300 rule. *Journal of forestry research*, *34*(3), 821-830.

Langemeyer, J., & Connolly, J. J. (2020). Weaving notions of justice into urban ecosystem services research and practice. *Environmental science & policy*, *109*, 1-14.

Le Quéré, C., Wilson, C., Barton, H., Hall, J. W., Minns, A., Prosser, M., Russell, A. E., Tebboth, M. G., & Topping, N. (2026). Irreversibility in climate action. *Nature Climate Change*, *16*(1), 5-7.

Lefstad, L., & Paavola, J. (2024). The evolution of climate justice claims in global climate change negotiations under the UNFCCC. *Critical Policy Studies*, *18*(3), 363-388.

Lind, E. A., Walker, L., Kurtz, S., Musante, L., & Thibaut, J. W. (1980). Procedure and outcome effects on reactions to adjudicated resolution of conflicts of interest. *Journal of Personality and Social Psychology*, *39*(4), 643.

Lindner, J. (2003). Institutional stability and change: two sides of the same coin¹. *Journal of European Public Policy*, *10*(6), 912-935.

Maassen, A. (2012). Heterogeneity of lock-in and the role of strategic technological interventions in urban infrastructural transformations. *European Planning Studies*, *20*(3), 441-460.

Martello, M. V., Whittle, A. J., Oddo, P. C., & de Neufville, R. (2024). Real options analysis for valuation of climate adaptation pathways with application to transit infrastructure. *Risk Analysis*, *44*(5), 1046-1066.

Martin, R. (2010). Roepke lecture in economic geography—rethinking regional path dependence: beyond lock-in to evolution. *Economic geography*, *86*(1), 1-27.

Microsoft. (2018). *Australia building footprints*. GitHub. Retrieved 29 January 2026 from <https://github.com/microsoft/AustraliaBuildingFootprints>

Munck af Rosenschöld, J., Rozema, J. G., & Frye‐Levine, L. A. (2014). Institutional inertia and climate change: a review of the new institutionalist literature. *Wiley Interdisciplinary Reviews: Climate Change*, *5*(5), 639-648.

Ottinger, G. (2024). Careful knowing as an aspect of environmental justice. *Environmental Politics*, *33*(2), 199-218.

Paavola, J. (2008). Science and social justice in the governance of adaptation to climate change. *Environmental Politics*, *17*(4), 644-659.

Paavola, J., & Adger, W. N. (2006). Fair adaptation to climate change. *Ecological economics*, *56*(4), 594-609.

Radunovic, B., & Le Boudec, J.-Y. (2007). A unified framework for max-min and min-max fairness with applications. *IEEE/ACM Transactions on networking*, *15*(5), 1073-1083.

Ruano‐Chamorro, C., Gurney, G. G., & Cinner, J. E. (2022). Advancing procedural justice in conservation. *Conservation Letters*, *15*(3), e12861.

Sanz-Hernández, A. (2024). Temporal negotiations and injustices in the energy transition: Perspectives from a Spanish coal region. *Energy Research & Social Science*, *110*, 103453.

Schipper, E. L. F., Revi, A., Preston, B. L., Carr, E. R., Eriksen, S. H., Fernandez-Carril, L. R., Glavovic, B. C., Hilmi, N. J. M., Ley, D., Mukerji, R., Muylaert de Araujo, M. S., Perez, R., Rose, S. K., & Singh, P. K. (2022). Climate Resilient Development Pathways. In H. O. Pörtner, D. C. Roberts, M. Tignor, E. S. Poloczanska, K. Mintenbeck, A. Alegría, M. Craig, S. Langsdorf, S. Löschke, V. Möller, A. Okem, & B. Rama (Eds.), *Climate Change 2022: Impacts, Adaptation and Vulnerability* (pp. 2655-2807). Cambridge University Press. <https://doi.org/10.1017/9781009325844.027>

Schlosberg, D. (2004). Reconceiving environmental justice: global movements and political theories. *Environmental Politics*, *13*(3), 517-540.

Seebauer, S., Thaler, T., Hanger-Kopp, S., & Schinko, T. (2023). How path dependency manifests in flood risk management: observations from four decades in the Ennstal and Aist catchments in Austria. *Regional environmental change*, *23*(1), 31.

Seto, K. C., Davis, S. J., Mitchell, R. B., Stokes, E. C., Unruh, G., & Ürge-Vorsatz, D. (2016). Carbon lock-in: types, causes, and policy implications. *Annual Review of Environment and Resources*, *41*(1), 425-452.

State Government of NSW and NSW Department of Planning Housing and Infrastructure. (2025). *Greater Sydney Canopy Access 2022, accessed from The Sharing and Enabling Environmental Data Portal*. Retrieved 24 October 2025 from <https://datasets.seed.nsw.gov.au/dataset/1aacf341-945d-4392-b53d-9d266468963f>

Stroombergen, A., & Lawrence, J. (2022). A novel illustration of real options analysis to address the problem of probabilities under deep uncertainty and changing climate risk. *Climate Risk Management*, *38*, 100458.

Swanson, K. (2023). Centering equity and justice in participatory climate action planning: guidance for urban governance actors. *Planning theory & practice*, *24*(2), 207-223.

Thaler, T., Hanger-Kopp, S., Schinko, T., & Nordbeck, R. (2023). Addressing path dependencies in decision-making processes for operationalizing compound climate-risk management. *Iscience*, *26*(7).

Thibaut, J. W., & Walker, L. (1975). Procedural justice: A psychological analysis. *(No Title)*.

Tyler, T. R. (2000). Social Justice: Outcome and Procedure. *International Journal of Psychology*, *35*(2), 117-125. <https://doi.org/https://doi.org/10.1080/002075900399411>

Tyler, T. R. (2003). Procedural justice, legitimacy, and the effective rule of law. *Crime and justice*, *30*, 283-357.

Unruh, G. C. (2000). Understanding carbon lock-in. *Energy policy*, *28*(12), 817-830.

Van Der Jagt, A. P., Buijs, A., Dobbs, C., Van Lierop, M., Pauleit, S., Randrup, T. B., Skiba, A., & Wild, T. (2023). With the process comes the progress: A systematic review to support governance assessment of urban nature-based solutions. *Urban Forestry & Urban Greening*, *87*, 128067.

Vergne, J.-P., & Durand, R. (2011). The path of most persistence: An evolutionary perspective on path dependence and dynamic capabilities. *Organization Studies*, *32*(3), 365-382.

Walker, G. (2012). *Environmental justice: concepts, evidence and politics*. Routledge.

Wenta, J., McDonald, J., & McGee, J. S. (2019). Enhancing resilience and justice in climate adaptation laws. *Transnational Environmental Law*, *8*(1), 89-118.

Werners, S. E., Wise, R. M., Butler, J. R., Totin, E., & Vincent, K. (2021). Adaptation pathways: A review of approaches and a learning framework. *Environmental science & policy*, *116*, 266-275.

Wilson, G. A. (2014). Community resilience: path dependency, lock-in effects and transitional ruptures. *Journal of Environmental Planning and Management*, *57*(1), 1-26.

Wise, R. M., Fazey, I., Smith, M. S., Park, S. E., Eakin, H. C., Van Garderen, E. A., & Campbell, B. (2014). Reconceptualising adaptation to climate change as part of pathways of change and response. *Global environmental change*, *28*, 325-336.

Zanaga, D., Van De Kerchove, R., Daems, D., De Keersmaecker, W., Brockmann, C., Kirches, G., Wevers, J., Cartus, O., Santoro, M., Fritz, S., Lesiv, M., Herold, M., Tsendbazar, N. E., Xu, P., Ramoino, F., & Arino, O. (2022). *ESA WorldCover 10 m 2021 v200* Zenodo. <https://doi.org/https://doi.org/10.5281/zenodo.7254221>

Ziter, C. D., Pedersen, E. J., Kucharik, C. J., & Turner, M. G. (2019). Scale-dependent interactions between tree canopy cover and impervious surfaces reduce daytime urban heat during summer. *Proceedings of the National Academy of Sciences*, *116*(15), 7575-7580.
